# Supplementary material for: Land use strategies to mitigate climate change in carbon dense temperate forests
Source: PubMed Central journal article supplement — Proc Natl Acad Sci U S A. 2018 Mar 19;115(14):3663–8. doi: 10.1073/pnas.1720064115 (PMC5889652; doi:10.1073/pnas.1720064115), 2018-03-19
Supplement: pnas.201720064SI.pdf [file pnas.201720064SI.pdf]

# Supporting Information

Law et al. 10.1073/pnas.1720064115

## SI Materials and Methods

**Current Stocks and Fluxes.** Live tree biomass and dead tree biomass were calculated using ecoregion- and species-specific allometric equations that use both height and diameter (DBH) in the equations for predicting bole and coarse root volume as well as bark, branch, and foliage biomass. Fine root biomass was calculated from coarse root biomass (1). In cases where an ecoregion- and/or species-specific equation was not available, substitutions were made by genus or like form (e.g., pines with tap roots). Ecoregion-specific wood density data were used to convert bole and coarse root volume to biomass with substitutions made by genus, like form, etc. Dead tree branch, bark, and foliage biomass were adjusted based on decay class (e.g., a decay class of “0” indicates many branches and some foliage are still present versus higher decay classes indicating more to complete branch, bark, or foliage loss). Downed dead wood biomass was calculated by FIADB v.4.0 methods (line transect method for piece volume by size class), and species- and size-specific wood densities were reduced by decay class. Stump abundance was estimated from a relationship between stand age and the number of tree records on the plot recorded as “cut or removed.” Stump volume was calculated as a cylinder 1 ft in height with an average DBH by species and age class, and was converted to biomass using decay class-adjusted, species-specific wood densities as for downed wood. Understory biomass (seedlings and shrubs) was calculated from shrub volume (percent cover and height), combined with an allometric equation database developed from harvested shrubs in previous studies (2–4) and from the shrub extension to BIOPAK (5). Again, substitution for species not represented in the database was applied by genus, family, like form, etc. Litter and duff biomass estimates were the product of plot average depth and material carbon density provided for each forest type in the FIA database tables. Conversions to carbon were calculated based on a carbon density of 0.5 for all live pools (Tables S1 and S2).

For NPP and NEP, we used a mass-balance approach with data from FIA and >200 regional study plots. NPP of woody components (branches and stems) was computed from the difference in biomass at two points in time divided by the measurement interval. Previous diameter and height for each tree were used to calculate the previous biomass. Previous diameter was derived from current diameter and radial increment. Previous height was recorded on remeasured trees or modeled for unmeasured trees in the previous inventory using diameter-height equations (3). Woody shrub, foliage, and fine root NPP were calculated from the additional regional plot data (2).

NEP was computed from NPP minus Rh using a mass balance approach (6):

$$\text{NEP} = \text{aboveground NPP} - \text{dead wood decomposition} \\ - \text{litterfall} + \Delta \text{root} + \Delta \text{soil C}.$$

We estimated NEP from aboveground NPP minus dead wood decomposition minus litterfall plus the change in coarse and fine root carbon and the change in soil carbon (4). We assumed that annual soil respiration is in balance with litterfall, belowground

carbon allocation, and change in carbon in roots and soils. Deadwood decomposition was estimated using a global dataset of wood decomposition rates for tree species modified by response to temperature, precipitation, diameter, and position [standing or downed wood (7)]. Foliage NPP was estimated from foliage biomass divided by leaf retention time. Litterfall was estimated from foliage NPP and 20% mass loss on abscission. We assumed litterfall turns over annually (losses equal additions to litter pool). Change in coarse root carbon was calculated as the difference between coarse root NPP and decomposition of dead tree and stump coarse roots. Change in soil C was estimated from an observed relationship with stand age calculated from a synthesis of chronosequence plot data in Oregon (8), where stand ages <50 y are losing soil carbon at the rate of 0.05–1.0 Mg C ha<sup>-1</sup>·y<sup>-1</sup>, and then increased at rates of 0.01–0.05 Mg C ha<sup>-1</sup>·y<sup>-1</sup> until no net change at ~200 y. We assumed no change in fine root carbon.

NECB is NEP minus losses due to fire or harvest, and it determines whether a forest is a net source or sink of atmospheric carbon dioxide (9). Harvest histories were constructed using Oregon Department of Forestry historical datasets. Harvest volumes were converted to biomass removals using wood density data (10) (Tables S3 and S4). Fire emissions were computed using annual burn area estimates for each severity class (low, moderate, and high; Monitoring Trends in Burn Severity database), biomass data, and region-specific combustion factors for each pool [large stems, small stems, downed dead wood, understory vegetation, standing dead wood, and litter pools (11, 12)]. Monitoring Trends in Burn Severity dataset burn areas are at least 404 ha in size (1,000 acres), which accounts for 92% of the total burn area of forests in the western United States (13). The Monitoring Trends in Burn Severity data on burn area are consistently correlated with field measurements in conifer forests of the western United States.

**Uncertainty Analysis.** For the observation-based analysis, Monte Carlo simulations were used to conduct an uncertainty analysis with the mean and SDs for NPP and Rh calculated using several approaches. For NPP, three sets of allometric equations were used to estimate the uncertainty due to variation in region- and/or species-specific allometry. The full suite of species-specific equations that use tree diameter (DBH) and height (preferred) were compared with a DBH-only national set and with a grouped forest-type set. For Rh, the variation in the calculated decomposition rate was used to quantify the uncertainty. A species-specific lookup table of decay constants was compared with decay constants that were allowed to vary by genus, precipitation, and temperature or by class, precipitation, and temperature. Finally, uncertainty in NECB was calculated as the combined uncertainty of NEP, fire emissions (10%), harvest emissions (7%), and land cover estimates (10%) using the propagation of error approach. Uncertainty in CLM4.5 model simulations and LCA was quantified by combining the uncertainty in the observations used to evaluate the model, the uncertainty in input datasets (e.g., remote sensing), and the uncertainty in the LCA coefficients (14).

Methods for Tables S3–S5 are provided in the main text.

1. Kurz WA, Beukema SJ, Apps MJ (1996) Estimation of root biomass and dynamics for the carbon budget model of the Canadian forest sector. *Can J For Res* 26:1973–1979.
2. Van Tuyl S, Law BE, Turner DP, Gitelman AI (2005) Variability in net primary production and carbon storage in biomass across Oregon forests—An assessment integrating data from forest inventories, intensive sites, and remote sensing. *For Ecol Manage* 209:273–291.
3. Hudiburg T, et al. (2009) Carbon dynamics of Oregon and Northern California forests and potential land-based carbon storage. *Ecol Appl* 19:163–180.

4. Hudiburg TW, Law BE, Wirth C, Luysaert S (2011) Regional carbon dioxide implications of forest bioenergy production. *Nat Clim Chang* 1:419–423.
5. Means JE, Hansen HA, Koerper GJ, Alaback PB, Klopsch MW (1996) BIOPAK. *Bull Ecol Soc Am* 77:84–85.
6. Campbell J, Alberti G, Martin J, Law BE (2009) Carbon dynamics of a ponderosa pine plantation following a thinning treatment in the northern Sierra Nevada. *For Ecol Manage* 257:453–463.

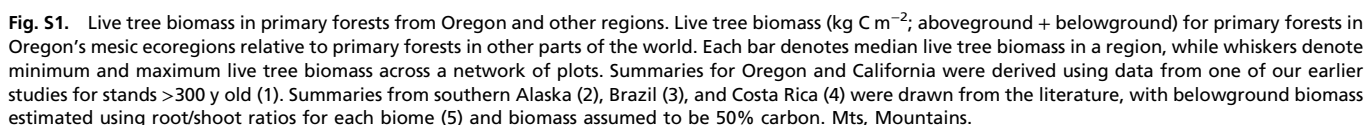

1. Hudiburg TW, Law BE, Wirth C, Luysaert S (2011) Regional carbon dioxide implications of forest bioenergy production. *Nat Clim Chang* 1:419–423.
2. Leighty WW, Hamburg SP, Caouette J (2006) Effects of management on carbon sequestration in forest biomass in southeast Alaska. *Ecosystems (N Y)* 9:1051–1065.
3. Gonçalves F, et al. (2017) Estimating aboveground biomass in tropical forests: Field methods and error analysis for the calibration of remote sensing observations. *Remote Sens* 9:47.
4. Dubayah RO, et al. (2010) Estimation of tropical forest height and biomass dynamics using lidar remote sensing at La Selva, Costa Rica. *J Geophys Res Biogeosci* 115:G00E09.
5. Mokany K, Raison R, Prokushkin AS (2006) Critical analysis of root: Shoot ratios in terrestrial biomes. *Glob Change Biol* 12:84–96.

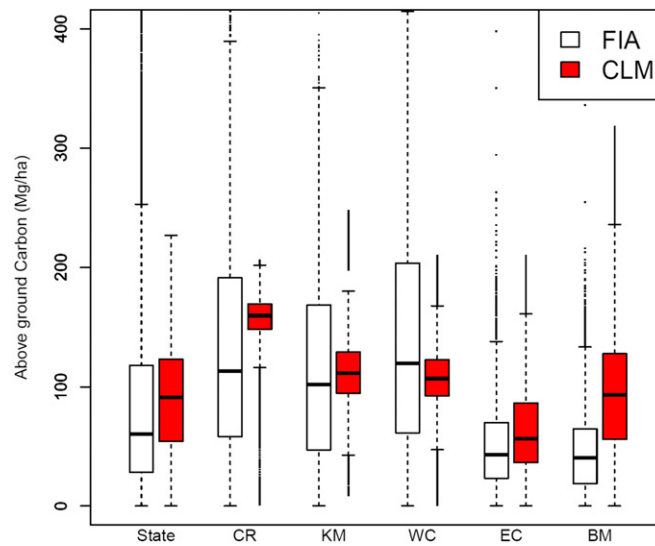

**Fig. S2.** Evaluation of simulated aboveground tree carbon. Comparison between observed aboveground tree carbon stocks derived from FIA surveys and simulated by CLM4.5. Estimates are provided for the state and by ecoregion. Ecoregions include the Coastal Range (CR), Klamath Mountains (KM), Western Cascades (WC), Eastern Cascades (EC), and Blue Mountains (BM). The intrabox line denotes median value, box edges denote the 25th and 75th percentiles, and whiskers extend the interquartile range 1.5-fold.



**Table S1. State total carbon stocks by ecoregion (Tg·C)**

| Ecoregion         | Live trees | Dead trees | CWD*   | FWD  | Shrubs | Litter and duff | Soil C | Total C |
|-------------------|------------|------------|--------|------|--------|-----------------|--------|---------|
| <b>2001–2005</b>  |            |            |        |      |        |                 |        |         |
| Blue Mountains    | 230.32     | 39.49      | 35.74  | 0.32 | 2.55   | 44.88           | 226.18 | 579     |
| West Cascades     | 481.52     | 52.96      | 48.05  | 0.77 | 6.21   | 43.62           | 249.98 | 883     |
| Coast Range       | 328.87     | 18.87      | 31.43  | 0.80 | 8.19   | 42.30           | 211.47 | 641     |
| Columbia Plateau  | 2.03       | 0.32       | 0.31   | 0.00 | 0.02   | 0.39            | 1.95   | 5       |
| East Cascades     | 137.16     | 21.62      | 22.44  | 0.19 | 1.78   | 31.72           | 129.93 | 345     |
| Klamath Mountains | 214.59     | 24.29      | 19.97  | 0.34 | 2.72   | 18.50           | 112.53 | 393     |
| Northern Basin    | 11.16      | 2.17       | 1.55   | 0.02 | 0.10   | 2.27            | 10.95  | 28      |
| Willamette Valley | 48.91      | 5.31       | 4.87   | 0.08 | 0.62   | 4.44            | 25.57  | 90      |
| State total       | 1,454.57   | 165.03     | 164.37 | 2.52 | 22.20  | 188.13          | 968.57 | 2,965   |
| <b>2006–2010</b>  |            |            |        |      |        |                 |        |         |
| Blue Mountains    | 235.71     | 37.13      | 35.68  | 0.31 | 2.70   | 40.74           | 224.01 | 576     |
| West Cascades     | 481.45     | 53.38      | 47.77  | 0.78 | 6.31   | 43.00           | 249.83 | 883     |
| Coast Range       | 334.77     | 22.74      | 32.17  | 0.87 | 8.44   | 38.91           | 213.40 | 651     |
| Columbia Plateau  | 2.10       | 0.30       | 0.32   | 0.00 | 0.02   | 0.35            | 1.94   | 5       |
| East Cascades     | 141.64     | 19.04      | 19.27  | 0.20 | 2.04   | 19.91           | 128.84 | 331     |
| Klamath Mountains | 215.64     | 24.67      | 20.31  | 0.35 | 2.76   | 18.65           | 113.46 | 396     |
| Northern Basin    | 11.22      | 2.13       | 1.51   | 0.02 | 0.12   | 2.19            | 10.95  | 28      |
| Willamette Valley | 49.19      | 5.36       | 4.88   | 0.08 | 0.64   | 4.44            | 25.67  | 90      |
| State total       | 1,471.71   | 164.75     | 161.89 | 2.62 | 23.04  | 168.20          | 968.10 | 2,960   |
| <b>2011–2015</b>  |            |            |        |      |        |                 |        |         |
| Blue Mountains    | 238.20     | 38.34      | 37.63  | 0.33 | 2.88   | 42.08           | 224.98 | 584     |
| West Cascades     | 489.55     | 54.02      | 47.77  | 0.76 | 5.88   | 42.99           | 249.48 | 890     |
| Coast Range       | 379.02     | 30.02      | 32.79  | 0.79 | 5.91   | 38.13           | 209.50 | 696     |
| Columbia Plateau  | 2.09       | 0.31       | 0.34   | 0.00 | 0.03   | 0.37            | 1.94   | 5       |
| East Cascades     | 140.54     | 26.38      | 18.57  | 0.18 | 2.05   | 25.42           | 130.37 | 344     |
| Klamath Mountains | 217.21     | 24.59      | 20.11  | 0.35 | 2.58   | 18.29           | 112.83 | 396     |
| Willamette Valley | 12.20      | 2.33       | 1.60   | 0.02 | 0.14   | 2.41            | 10.92  | 30      |
| Northern Basin    | 49.89      | 5.44       | 4.90   | 0.08 | 0.60   | 4.40            | 25.57  | 91      |
| State total       | 1,528.70   | 181.42     | 163.72 | 2.52 | 20.06  | 174.10          | 965.58 | 3,036   |

Values are derived from inventory (FIA) and >200 intensive plots. FWD, fine woody debris.

\*Coarse woody debris (CWD) does not include stumps.

**Table S2. State mean carbon stocks by ecoregion (Mg C ha<sup>-1</sup>)**

| Ecoregion         | Live trees | Dead trees | CWD   | FWD  | Shrubs | Litter and duff | Soil C | Total C |
|-------------------|------------|------------|-------|------|--------|-----------------|--------|---------|
| <b>2001–2005</b>  |            |            |       |      |        |                 |        |         |
| Blue Mountains    | 62.13      | 10.65      | 9.64  | 0.09 | 0.69   | 12.11           | 61.02  | 156.32  |
| West Cascades     | 172.13     | 18.93      | 17.18 | 0.28 | 2.22   | 15.59           | 89.36  | 315.69  |
| Coast Range       | 155.91     | 8.95       | 14.90 | 0.38 | 3.88   | 20.05           | 100.25 | 304.32  |
| Columbia Plateau  | 54.13      | 8.49       | 8.28  | 0.07 | 0.62   | 10.41           | 51.86  | 133.87  |
| East Cascades     | 61.37      | 9.67       | 10.04 | 0.09 | 0.80   | 14.19           | 58.13  | 154.29  |
| Klamath Mountains | 171.33     | 19.39      | 15.94 | 0.27 | 2.17   | 14.77           | 89.85  | 313.73  |
| Northern Basin    | 60.13      | 11.68      | 8.35  | 0.09 | 0.53   | 12.22           | 59.01  | 152.01  |
| Willamette Valley | 168.49     | 18.30      | 16.77 | 0.27 | 2.15   | 15.31           | 88.08  | 309.38  |
| State average     | 115.31     | 13.08      | 13.03 | 0.20 | 1.76   | 14.91           | 76.78  | 235.07  |
| <b>2006–2010</b>  |            |            |       |      |        |                 |        |         |
| Blue Mountains    | 63.58      | 10.02      | 9.63  | 0.08 | 0.73   | 10.99           | 60.43  | 155.46  |
| West Cascades     | 172.10     | 19.08      | 17.07 | 0.28 | 2.26   | 15.37           | 89.31  | 315.47  |
| Coast Range       | 158.70     | 10.78      | 15.25 | 0.41 | 4.00   | 18.45           | 101.17 | 308.76  |
| Columbia Plateau  | 55.94      | 8.03       | 8.44  | 0.07 | 0.64   | 9.39            | 51.54  | 134.05  |
| East Cascades     | 63.37      | 8.52       | 8.62  | 0.09 | 0.91   | 8.91            | 57.65  | 148.07  |
| Klamath Mountains | 172.17     | 19.70      | 16.21 | 0.28 | 2.20   | 14.89           | 90.59  | 316.05  |
| Northern Basin    | 60.43      | 11.46      | 8.12  | 0.10 | 0.64   | 11.78           | 58.98  | 151.50  |
| Willamette Valley | 169.43     | 18.47      | 16.81 | 0.28 | 2.20   | 15.30           | 88.41  | 310.90  |
| State average     | 116.66     | 13.06      | 12.83 | 0.21 | 1.83   | 13.33           | 76.74  | 234.67  |
| <b>2011–2015</b>  |            |            |       |      |        |                 |        |         |
| Blue Mountains    | 64.26      | 10.34      | 10.15 | 0.09 | 0.78   | 11.35           | 60.69  | 157.66  |
| West Cascades     | 175.00     | 19.31      | 17.08 | 0.27 | 2.10   | 15.37           | 89.18  | 318.31  |
| Coast Range       | 179.68     | 14.23      | 15.55 | 0.37 | 2.80   | 18.08           | 99.32  | 330.02  |
| Columbia Plateau  | 55.63      | 8.38       | 9.11  | 0.08 | 0.69   | 9.97            | 51.69  | 135.55  |
| East Cascades     | 62.88      | 11.80      | 8.31  | 0.08 | 0.92   | 11.38           | 58.33  | 153.69  |
| Klamath Mountains | 173.42     | 19.63      | 16.06 | 0.28 | 2.06   | 14.60           | 90.09  | 316.14  |
| Willamette Valley | 65.72      | 12.53      | 8.64  | 0.10 | 0.73   | 13.00           | 58.81  | 159.53  |
| Northern Basin    | 171.86     | 18.73      | 16.88 | 0.27 | 2.05   | 15.15           | 88.06  | 313.01  |
| State average     | 121.18     | 14.38      | 12.98 | 0.20 | 1.59   | 13.80           | 76.54  | 240.67  |

Values are derived from inventory (FIA) and >200 intensive plots. FWD, fine woody debris.

\*Coarse woody debris (CWD) does not include stumps.

**Table S3. Forest sector emissions (million tCO<sub>2</sub>e·y<sup>-1</sup>) calculated from the LCA**

| Period    | Utility fuel | WD1*  | WD2 <sup>†</sup> | Total wood product emissions <sup>‡</sup> | Wood substitution credits | Net wood product emissions |
|-----------|--------------|-------|------------------|-------------------------------------------|---------------------------|----------------------------|
| 2001–2005 | –1.18        | –8.67 | –51.85           | –61.70                                    | 29.09                     | –32.61                     |
| 2006–2010 | –1.06        | –7.84 | –52.00           | –60.91                                    | 26.30                     | –34.60                     |
| 2011–2015 | –1.18        | –8.72 | –53.79           | –63.69                                    | 29.23                     | –34.45                     |

Average emissions are calculated for each period.

\*WD1 is emissions in manufacturing processes.

<sup>†</sup>WD2 is wood decomposed over time from product use.

<sup>‡</sup>Total wood product emissions are the sum of utility fuel, WD1, and WD2.



**Table S7. Grass seed crop reduction in irrigation demand due to afforestation**

| Year | Grass crop area, ha | Irrigation demand total,<br>billion m <sup>3</sup> ·y <sup>-1</sup> | Irrigation demand<br>per hectare,* m <sup>3</sup> ·y <sup>-1</sup> | Reduced irrigation demand, <sup>†</sup><br>billion m <sup>3</sup> ·y <sup>-1</sup> |
|------|---------------------|---------------------------------------------------------------------|--------------------------------------------------------------------|------------------------------------------------------------------------------------|
| 2015 | 238,679             | 413                                                                 | 1,730,027                                                          | 220                                                                                |
| 2050 | 235,600             | 412                                                                 | 1,748,277                                                          | 222                                                                                |
| 2100 | 220,524             | 405                                                                 | 1,838,234                                                          | 233                                                                                |

Grass crop area and irrigation demand are projected under future climate and management scenarios using hydrology and agricultural models (Willamette Water 2100, 2017) (1).

\*Irrigation demand per hectare was computed from an agricultural water demand submodel, which estimates daily water demand for each crop type, where ET is a function of climate, crop type, crop growth state, and available soil water capacity. A crop decision submodel determines the crop type by calculating the probability of growing several crop categories and accounts for irrigation water rights.

<sup>†</sup>Reduced irrigation demand is due to afforestation of 127,000 ha of irrigated grass seed crop that can support native forests without irrigation under future climate conditions.

1. Hudiburg TW, Law BE, Thornton PE (2013) Evaluation and improvement of the community land model (CLM4) in Oregon forests. *Biogeosciences* 10:453–470.
